# Supplementary material
Source: PubMed Central journal article supplement (PMC3131635)
Supplement: supp_77_12_4223__1.pdf [file supp_77_12_4223__1.pdf]

## 1 SUPPLEMENTAL MATERIAL

2  
3  
4 **BTII, an Azoreductase with pH Dependent Substrate Specificity**5  
6 **Hans E. Johansson, Mary K. Johansson, Albert C. Wong, Eliana S. Armstrong, Erik J**  
7 **Peterson, Richard E. Grant, Margaret A. Roy, Mark V. Reddington, Ronald M. Cook**8  
9 Biosearch Technologies, Inc., 81 Digital Drive, Novato, CA 94949-572810  
11 **Abbreviations:** BHQ: Black Hole Quencher, BTII: Biosearch Technologies, Inc. azoreductase  
12 1, CHES: *N*-cyclohexyl-2-aminoethanesulfonic acid, FO: Flame Orange, MeR: Methyl Red,  
13 MeO: Methyl Orange, ESI: electrospray ionization, FAD: flavin adenine dinucleotide, FMN:  
14 flavin mononucleotide, HPLC: high pressure liquid chromatography, JGB: Janus Green B, LC:  
15 liquid chromatography, MES: 2-(*N*-morpholino)ethanesulfonic acid, MOPS: 3-(*N*-  
16 morpholino)propanesulfonic acid, MS: mass spectrometry, and Tris:  
17 tris(hydroxymethyl)aminomethane.  
18  
19

1  
2 1 - ATGAAACTAGTCGTTATTAACGGTACACCAAGAAAATTAGGTAGAACTCGCGTTGTGGCA - 60  
3 1 - M K L V V I N G T P R K L G R T R V V A - 20  
4 61 - AAATATATTGCAGATCAATTTGAAGGGGAATTATACGATTTAGCAATAGAGGAATTGCCT - 120  
5 21 - K Y I A D Q F E G E L Y D L A I E E L P - 40  
6 121 - TTATATAATGGCGAAGAATCGCAACGTGATTTAGAGGCAGTAAAAAATTTAAAAGCGTTA - 180  
7 41 - L Y N G E E S Q R D L E A V K K L K A L - 60  
8 181 - GTGAAAGCAGCAGACGGTGTAGTACTATGTACACCAGAATATCATAATGCAATGAGCGGA - 240  
9 61 - V K A A D G V V L C T P E Y H N A M S G - 80  
10 241 - GCGCTGAAAAACTCGTTAGATTACTTAAGTAGTAGTGAGTTTATCCATAAACCTGTGCA - 300  
11 81 - A L K N S L D Y L S S S E F I H K P V A - 100  
12 301 - TTACTAGCTGTTGCGGGGGCGGTAAAGGAGGAATTAACGCATTAATAGTATGCGAACT - 360  
13 101 - L L A V A G G G K G G I N A L N S M R T - 120  
14 361 - GTTGCTAGAGGTGTTTACGCAAATGCAATCCCAAAACAAGTAGTACTTGATGGACTTCAC - 420  
15 121 - V A R G V Y A N A I P K Q V V L D G L H - 140  
16 421 - GTACAAGATGGTGAACCTGGAGAAGATGCAAAACCATTAATTCATGATGTAGTTAAAGAA - 480  
17 141 - V Q D G E L G E D A K P L I H D V V K E - 160  
18 481 - TTAAAAGCATATATGAGCGTATATAAAGAGGTGAAAAACAACCTAGGAGTGGAGTGA - 537  
19 161 - L K A Y M S V Y K E V K K Q L G V E \* - 178  
20

21 **Figure S1.** Gene and protein sequence of BTII (GenBank accession number EU664999). Underlined and  
22 in bold are Leucine 13 and Cysteine 70.

23

24

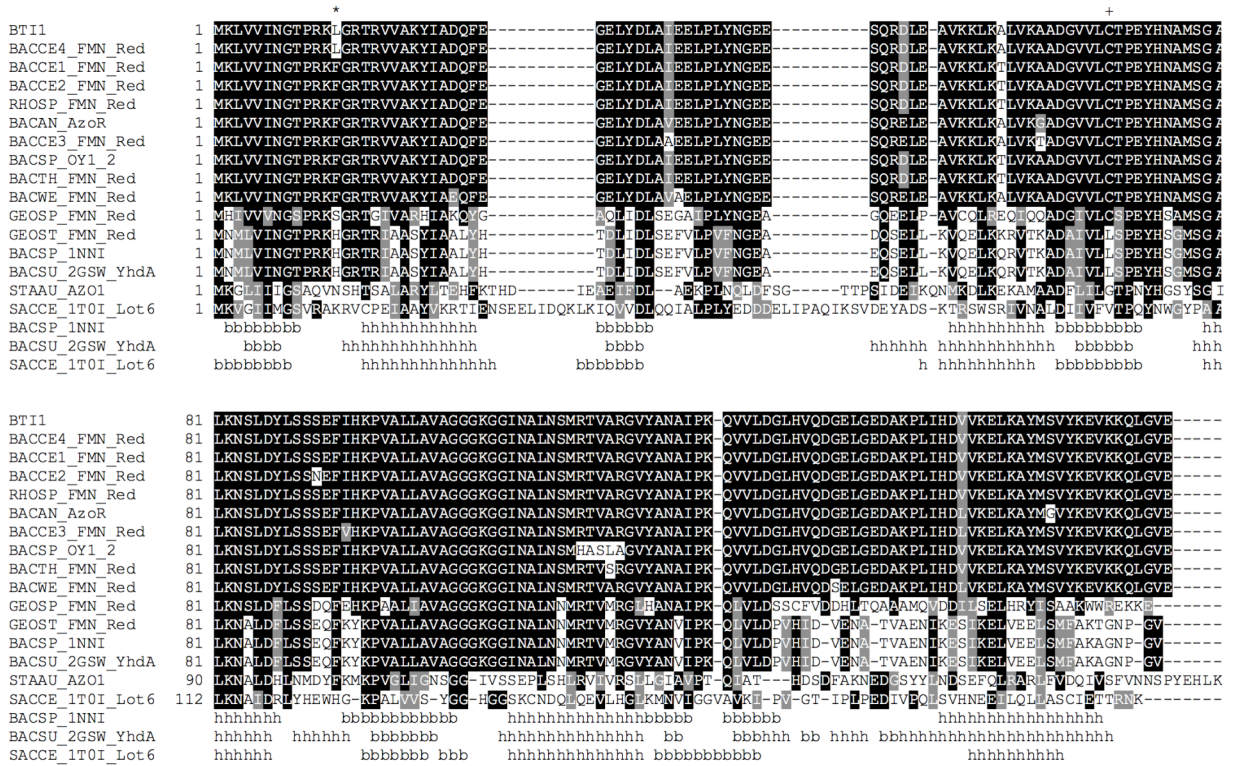

1  
 2 **Figure S2.** Alignment of BTI1 and related protein sequences. Sequences used for the alignment: BTI1:  
 3 uncultured *Bacillus* sp., NADPH-dependent azoreductase, ACI12881 (this study); BACAN\_AzoR:  
 4 *Bacillus anthracis* str. A0488, azoreductase, ZP\_02215196 (unpubl.); BACCE1\_FMN\_Red: *B. cereus*  
 5 ATCC 14579, azoreductase, NP\_831994 (10); BACCE2\_FMN\_Red: *B. cereus* G9241, azoreductase,  
 6 ZP\_00236672 (9); BACCE3\_FMN\_Red: *B. cereus* R309803, NADPH azoreductase, ZP\_04289233  
 7 (unpubl.); BACCE4\_FMN\_Red: *B. cereus* Rock4-18, NADPH azoreductase, ZP\_04207938 (unpubl.);  
 8 BACSP\_OY1\_2: *Bacillus* sp. OY1-2, azoreductase, BAB13746 (21); BACSP\_1NNI\_AzBz\_Red: *B.*  
 9 *subtilis* azobenzene reductase, 1NNI (unpubl.); BACSU\_2GSW\_YhdA: *B. subtilis*, put. NADPH-  
 10 dependent azobenzene FMN-reductase YhdA, 2GSW (unpubl.); BACTH\_FMN\_Red: *B. thuringiensis*  
 11 Bt407, NADPH azoreductase, ZP\_04139267 (unpubl.); BACWE\_FMN\_Red: *B. weihenstephanensis*  
 12 KBAB4, azobenzene reductase, YP\_001644949 (16); GEOSP\_FMN\_Red: *Geobacillus* sp. WCH70,  
 13 NADPH-dependent FMN reductase, YP\_002948705 (unpubl.); GEOST\_FMN\_Red: *G.*  
 14 *stearothermophilus*, azoreductase, BAB85975 (20); RHOSP\_FMN\_Red: *Rhodobacter sphaeroides*,  
 15 azoreductase, AAN17400 (24); STAAU\_AZO1: *Staphylococcus aureus* NADPH-dependent aerobic

1 flavo-azoreductase, AAT29034 (5); and SACCE\_1T0I\_Lot6: *Saccharomyces cerevisiae* NA(D)PH-  
2 dependent FMN reductase Ylr011wp, 1T0I (13). The definition FMN\_Red is used as provided by  
3 GenBank. Residues corresponding to BTI1 Leucine 13 and Cysteine 70 are indicated by "\*". The  
4 secondary structure features (b:  $\beta$ -sheet, h:  $\alpha$ -helix) for 1nni, 2gsw, and 1t0i are indicated below the  
5 alignment.

6

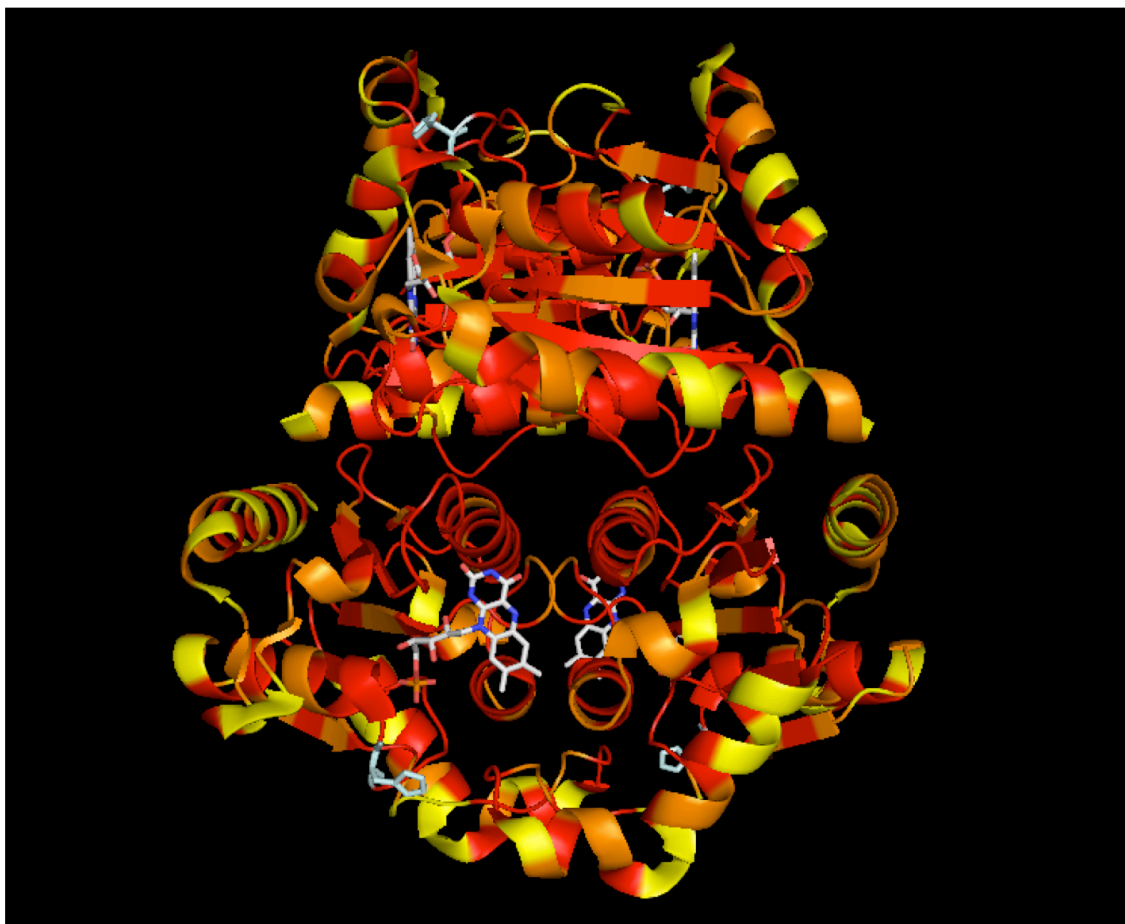

1  
2 **Figure S3.** BTI1 tetramer core residues are conserved in YhdA. Overall cartoon  $\alpha$ -helix and  $\beta$ -sheet  
3 homo-tetramer structure of *Bacillus* sp. YhdA (PDB ID: 2GSW). Conservation between BTI1 and YhdA  
4 is indicated in red (identical residues), orange (similar residues), and yellow (non-conserved residues).  
5 Stick models of the FMN co-factors and the variable residue 13 (His in YhdA) show the location the four  
6 active sites.

7

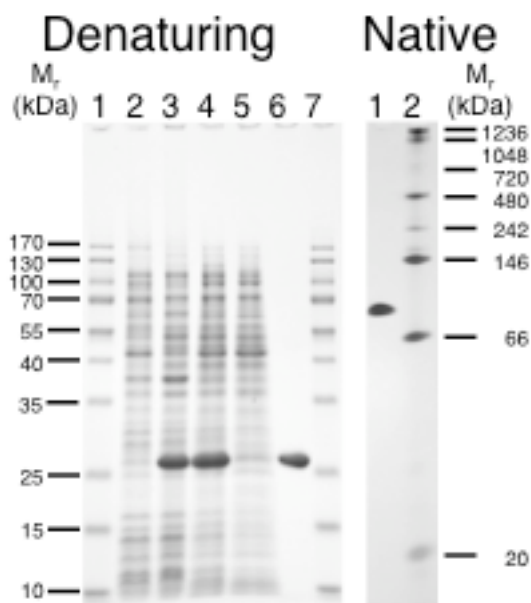

1  
2  
3 **Figure S4.** *Left panel:* Expression in *E. coli* BL21(DE3) pLysS and protein purification of BTI10  
4 azoreductase. Lanes 1 and 7: PAGE-Ruler size markers. Relative molecular weight indicated on the left.  
5 Lane 2, uninduced culture. Lane 3, induced culture. Lane 4, S10 extract. Lane 5: Nickel column flow  
6 through. Lane 6, eluted BTI10. *Right panel:* BTI10 azoreductase is a tetramer. Purified BTI10 (lane 1)  
7 was separated by native 14 % PAGE. Lane 2: Invitrogen's NativeMark size marker. Relative molecular  
8 weights indicated to right.

9  
10  
11

1

| <b>Component</b>  | <b>Abs signature (nm)</b>                           | <b>HPLC Elution time (min)</b> | <b>Calculated mass (g•mol<sup>-1</sup>)</b> | <b>Observed mass</b> |
|-------------------|-----------------------------------------------------|--------------------------------|---------------------------------------------|----------------------|
| Riboflavin        | 268, 369, 441                                       | 0.9                            | 376.36                                      | 377.08               |
| FMN               | 268, 369, 445                                       | 3.2                            | 456.34                                      | <b>457.06</b>        |
| FAD               | 266, 369, 446                                       | 4.2                            | 785.55                                      | 786.00               |
| BTI10 bound       | 274, 369, 446<br>(native)<br>268, 369, 447 (denat.) | 8.6<br>3.2                     | N/A                                         | <b>457.10</b>        |
| BTI10 polypeptide | N/A                                                 | N/A                            | 22,209.5                                    | 22,210.8             |

2

3 **Table SI.** HPLC and MS analyses of the BTI1 polypeptide and bound co-factor. Left panel: Flavin  
4 absorption signatures and HPLC elution times. Right Panel: Calculated and observed mass of flavins,  
5 BTI10 bound co-factor and polypeptide. For experimental details see supplemental methods.

6

7

## 1 SUPPLEMENTAL MATERIALS AND METHODS

2 **Reagents, media and bacterial strains.** All oligonucleotides were synthesized in house.  
3 Platinum *Taq*, Accuprime *Pfx*, pBAD/gIII, pSecTag2a, His-bond Ni-affinity media,  
4 polyacrylamide gels, NativeMark protein size marker, and *E. coli* LMG 194 were from  
5 Invitrogen (Carlsbad, CA). PAGE-Ruler denaturing protein size marker was from Fermentas  
6 (Glen Burnie, MD). BioSafe Coomassie protein stain was from Bio-Rad, (Hercules, CA).  
7 Restriction enzymes, Klenow fragment of *E. coli* DNA polymerase I, T4 DNA ligase, T4  
8 polynucleotide kinase, bovine alkaline and Antarctic phosphatases as well as *E. coli* Turbo cells  
9 were from New England BioLabs (Ipswich, MA). His-bind resin and buffer kit, pET28a,  
10 benzonase, *E. coli* TOP 10, and *E. coli* BL21(DE3) pLysS were from Novagen / EMD  
11 Biosciences (Madison, WI). Bicinchoninic acid (BCA)-assay kit was from Pierce (Rockford, IL).  
12 Plasmid preparation and DNA cleaning kits were from Qiagen (Valencia, CA). All other  
13 reagents and buffers were from Sigma-Aldrich (St. Louis, MO).

14  
15 **Isolation and sub-cloning of BTI1 azoreductase.** DNA was isolated from a 1 g soil sample  
16 collected from just below the surface of a grassy field in Novato, CA. It was amplified with PCR  
17 primers based on previous work (21) and extended with terminal *NcoI* and *HindIII* restriction  
18 sites: ESBT13 5' - CGAGCCATGGTGATGAAACTAGTCGTTATTAACGGTACA - 3' and  
19 ESBT15 5' - GTCTGAAAGCTTTCCTCCACTCCTAGTTGTTTTT - 3'. DNA amplification  
20 was achieved with Accuprime *Pfx* and thermocycling (95 °C 2 min, [95 °C 20 s, 60 °C 30 s, 68  
21 °C 60 s] x 35) on an ABI9700 (Applied Biosystems, Foster City, CA). Amplification products  
22 were digested with *NcoI* and *HindIII* and ligated into the same sites of pBAD/gIII. Positive  
23 clones were identified by colony PCR with plasmid-specific and insert-spanning primers by



1 using the same program and Platinum Taq. The nucleotide sequence reported in this paper was  
2 deposited in the GenBank database under accession number EU664999.

3 The isolated BTI1 (Biosearch Technologies, Inc. azoreductase #1) gene sequence was  
4 codon-optimized for expression in *E. coli* and mammalian cells. *De novo* gene synthesis in house  
5 and by Gene Oracle (Mountain View, CA) used in-house synthesized oligonucleotides and  
6 published protocols (11). The non-conserved Cys70 residue (Fig. S2) was replaced with a Val to  
7 minimize the possibility of oxidative damage in the absence of reducing agents and to enable  
8 future single site cysteine mutagenesis. Wild type and C70V BTI azoreductase genes were  
9 inserted into the SfiI and ApaI sites of pSecTag2a and in frame with the C-terminal Myc- and  
10 His-peptides to generate pBTI3 and pBTI4. The BTI1 wt and C70V containing NcoI-PmeI  
11 fragments from pBTI3 and pBTI4 were inserted into the NcoI and blunt-ended HindIII (filled in  
12 with Klenow fragment and dNTPs) of pET28a to create pBTI9 and pBTI10. The C-terminally  
13 tagged wt and C70V BTI proteins are referred to as BTI9 and BTI10. The C-terminal peptide  
14 sequence extension (in single letter amino acid code) is:

15 GSFQPEQKLISEEDLNSAVDSCAAALEHHHHHHH -COOH

16 Correct insertion was confirmed by restriction digestion and bidirectional sequencing with insert-  
17 specific or plasmid-specific primers (pBAD: pBAD forward and reverse; pSecTag2a: T7  
18 promoter and bGH polyA reverse; pET28: T7 promoter and T7 terminator) (Sequetech,  
19 Mountain View, CA and ELIM Bio, Hayward, CA).

20

21 **Enzyme expression in *E. coli* and purification.** BTI9 and BTI10 were expressed from pBTI9  
22 and pBTI10 in *E. coli* BL21(DE3)pLysS by using Novagen's Studier-based T7 expression  
23 system (19) as recommended, but with a with 0.8 mM IPTG to induce expression that proceeded

1 for 2 h. Samples removed before induction and at harvest were used to assess the level of  
2 expression. Treatment with 100 U Benzonase and 25 U hen egg white lysozyme for 20 min at 20  
3 °C ensured complete lysis and DNA-removal prior to denaturation and electrophoretic separation  
4 of proteins by Tris-glycine 14 % SDS-PAGE. Protein in gels was stained with BioSafe  
5 Coomassie stain (Bio-Rad) and visualized in an Alpha Imager.

6 Lysis and purification proceeded as recommended by Novagen, except that Benzonase  
7 (20 U / ml) and hen egg white lysozyme (5 U / ml) was added to complete lysis and DNA  
8 digestion. Ni-affinity column chromatography was as recommended, except that the column was  
9 washed with 20 and 100 mM imidazole in buffer (20 mM Tris-Cl pH 7.9, 500 mM NaCl) and  
10 eluted with 400 mM imidazole (in the same buffer) to yield > 95 % pure proteins as determined  
11 by SDS-PAGE. The buffer was exchanged of pooled fractions enzyme to 20 mM Tris-Cl pH 7.9  
12 or deionized H<sub>2</sub>O by Sephadex G50 size-exclusion chromatography prior to determination of  
13 protein concentration, spectrophotometric assessment of FMN content, and enzymatic activity  
14 measurements. Three standards were employed to determine the concentration of azoreductase  
15 protein by the BCA-assay: Bovine serum albumin, Bovine gamma globulin, and azoreductase  
16 itself freeze-dried in pre-weighed Eppendorf tubes, weighed, and reconstituted in H<sub>2</sub>O. The ratio  
17 of concentrations obtained was 0.82:0.47:1, respectively. Hence the azoreductase itself was used  
18 as a standard for all preparations of the BTI enzyme used for activity measurements. Native  
19 protein was separated by non-denaturing gel-electrophoresis essentially as before (6).

20

21 **Bioinformatics.** Plasmid sequence analysis and in silico manipulation were performed by using  
22 ApE (A Plasmid Editor) (M. Wayne Davis, [www.biology.utah.edu/jorgensen/wayned/ape/](http://www.biology.utah.edu/jorgensen/wayned/ape/)) and  
23 tools hosted at JustBio ([www.justbio.com](http://www.justbio.com)). Protein sequence alignment of group II azoreductases

1 was created with CLUSTAL\_X 2.0.7 (12) and conserved residues shaded with BOXSHADE 3.2.1 at  
2 [www.ch.embnet.org/software/BOX\\_form.html](http://www.ch.embnet.org/software/BOX_form.html) using 50 % cutoff for conservation. 3D structures  
3 were analyzed by using MACPYMOL 0.99 ([www.pymol.org](http://www.pymol.org)). The ProtParam tool at ExPASy  
4 ([us.expasy.org/tools/protparam.html](http://us.expasy.org/tools/protparam.html)) was employed to predict the mass of the BTI azoreductase  
5 variants. Identification of conserved domains was performed at NCBI  
6 ([www.ncbi.nlm.nih.gov/Structure/cdd/wrpsb.cgi](http://www.ncbi.nlm.nih.gov/Structure/cdd/wrpsb.cgi)) (14).

7  
8 **Substrates.** Alizarin Yellow R (5-[4-Nitrophenylazo]salicylic acid), Am-azo 1 (3-(4-[2-  
9 hydroxy-1-phenylcarbamoyl-propenylazo]-2-methyl-phenylazo)-phenyl}-trimethyl-ammonium  
10 Chloride), Basic Blue 41 (2-[[4-[ethyl(2-hydroxyethyl)amino]phenyl]azo]-6-methoxy-3-methyl-  
11 benzothiazolium, methyl sulfate salt, C.I. 11105), Disperse Orange 3 (4-[4-  
12 Nitrophenylazo]aniline), Janus Green B (JGB; 3-diethylamino-7-(4-dimethylaminophenylazo)-5-  
13 phenylphenazinium chloride, C.I. 11050), Methyl Orange (MeO; 4-[4-  
14 (Dimethylamino)phenylazo]benzenesulfonic acid sodium salt, C.I. 13025), *ortho*-Methyl Red (*o*-  
15 MeR; 2-(4-Dimethylaminophenylazo)benzoic acid, C.I. 13020), *para*-Methyl Red (*p*-MeR; 4-(4-  
16 Dimethylaminophenylazo)benzoic acid), Nitro-naphthyl-DMA (*N,N*-dimethyl-4-(4-nitro-1-  
17 naphthylazo)aniline), Orange G (1-Phenylazo-2-naphthol-6,8-disulfonic acid disodium salt, C.I.  
18 16230), Orange I (4-(4-Hydroxy-1-naphthylazo)benzenesulfonic acid sodium salt, C.I. 14600),  
19 Orange II (4-(2-Hydroxy-1-naphthylazo)benzenesulfonic acid sodium salt, C.I. 15510), and  
20 Ponceau BS (2-((2-hydroxy-1-naphthalenyl)azo)-5-((4-sulfophenyl)azo)-benzenesulfonic acid,  
21 disodium salt, C.I. 26905) were all from Sigma-Aldrich (St. Louis MS). Citrus yellow (1-methyl-  
22 4-((methylphenylhydrazono)methyl)-pyridinium methylsulfate, Basic Yellow 87), Flame Orange  
23 (FO; 2-[(4-aminophenyl)azo]-1,3-dimethyl-1H-imidazolium chloride, Basic Orange 31), and

1 Ruby Red (2[[4-(dimethylamino)phenyl]azo]-1,3-dimethylimidazolium chloride, Basic Red 51)  
2 were gifts from Ciba Corp. (Tarrytown, NY).

3

4 **Synthesis of compounds.** Synthesis and characterization of Black Hole Quencher 10 (BHQ-10;  
5 4-(Methyl-{4-[2-sulfo-4-(4-sulfo-phenylazo)-phenylazo]-phenyl}-amino)-butyric acid disodium  
6 salt) proceeded essentially as published (7). All reagents and solvents were either ACS reagent  
7 grade or HPLC/spectroscopy grade and were obtained from Sigma-Aldrich, Acros, TCI or  
8 Burdick & Jackson unless otherwise noted. MALDI mass spectrometry was performed on a  
9 Bruker Biflex III MALDI-TOF instrument. Electrospray mass spectrometry was performed on a  
10 Finnigan LC Q and LC-mass spectrometry was performed on a Micromass LCT ESI mass  
11 spectrometer coupled with a Waters 2790 HPLC and a 996 PDA detector. NMR analysis (<sup>1</sup>H:  
12 400 MHz) was performed by Acorn NMR (Livermore, CA).

13

14 *4-(Methyl-phenyl-amino)-butyric acid.* N-Methylaniline (32.1 g, 0.30 mol) and ethyl-4-  
15 bromobutyrate (61.7 g, 0.32 mol) were added to a 250 mL flask, and the mixture was heated at  
16 115 °C for 20 h. After cooling, the mixture was dissolved in ethyl acetate (500 mL). The solution  
17 was washed with 4.0 M sodium carbonate solution (2 x 300 mL), dried (MgSO<sub>4</sub>), filtered, and  
18 evaporated under vacuum to leave an oil that was distilled under vacuum to afford as a colorless  
19 oil (46.2 g, 70 %; b.p.115 °C at 0.37 mm Hg). The oil was added to a 1 L flask containing 1 M  
20 potassium hydroxide (500 mL) and the mixture was heated at reflux for 4 h. After cooling, the  
21 mixture was washed with ether (2 x 200 mL). The organic layer was dried (MgSO<sub>4</sub>), filtered, and  
22 evaporated under vacuum to recover the unreacted starting material. The aqueous layer was  
23 treated with concentrated hydrochloric acid to adjust the pH to the range 7-8. The concentration

1 of the product in the aqueous solution was calculated by subtracting the recovered starting  
2 material from the initial reaction quantity. Water was added to adjust the concentration of the 4-  
3 (methyl-phenyl-amino)-butyric acid solution to 0.5 M. This solution was used without further  
4 purification.

5

6 *Black Hole Quencher-10 (BHQ-10)*, 4-(Methyl-{4-[2-sulfo-4-(4-sulfo-phenylazo)-phenylazo]-  
7 phenyl}-amino)-butyric acid. Concentrated sulfuric acid (2 mL) was added dropwise to a  
8 solution of 4-amino-1,1'-azobenzene-3,4'-disulfonic acid sodium salt (1.56 g, 4.0 mmol) in  
9 water (30 ml) in a 100 ml flask. The resulting suspension was cooled in an ice bath. A solution  
10 of sodium nitrite (0.32 g, 4.6 mmol) in water (30 mL) was added dropwise over 15 min, causing  
11 formation of a yellow-brown solution. The mixture was stirred for 1 h. To a 250 mL flask were  
12 added saturated aqueous sodium bicarbonate (50 mL) and the solution of 4-(methyl-phenyl-  
13 amino)-butyric acid solution (10 mL, 5 mmol), and the mixture was cooled in an ice bath. The  
14 cold acidic solution was added to the basic mixture portionwise over 15 min. Saturated aqueous  
15 sodium bicarbonate was added to raise the pH to 7.5 and then the mixture was stirred overnight.  
16 The reaction mixture was added directly to a column of macroporous polystyrene (13 x15 cm) in  
17 water and the column was eluted with water. Fractions of the deep purple band were collected  
18 and were checked for purity using C18 impregnated silica TLC plates (Analtech). Pure fractions  
19 were combined and then concentrated to 100 ml by rotary evaporation. The solution was filtered  
20 and then evaporated to afford a dark brown solid (1.62 g, 67%). TLC rf 0.27 (C18 impregnated  
21 silica plate 15% methanol in water);  $\lambda_{\text{max}}$  516 nm ( $\epsilon$  30,400) in carbonate-bicarbonate buffer pH  
22 8.5, 516 nm ( $\epsilon$  28,700) in PBS pH 7.0;  $^1\text{H NMR}$  ( $\text{D}_2\text{O}$  + 2% (v/v) 30% NaOD) 1.78 (quintet, J =  
23 7.4 Hz, 2H), 2.19 (t, J = 7.5 Hz, 2H), 2.82 (s, 3H), 3.25 (t, J = 7.3 Hz, 2H), 6.59 (d, J = 9.2 Hz,

1 2H), 7.20 (d, J = 8.6 Hz, 2H), 7.61-7.68 (m, 2H), 7.81 (d, J = 8.6 Hz, 2H), 7.96 (d, J = 8.6 Hz,  
2 2H) and 8.37 (d, J = 2.2 Hz, 1H); <sup>13</sup>C NMR 26.1, 37.5, 40.8, 54.4, 114.4, 120.8, 126.0, 126.3,  
3 128.9, 129.5, 129.6, 142.2, 145.8, 147.6, 153.1, 153.6, 155.4, 156.0, 185.6; ESI-MS observed (-)  
4 560.1 (M-H)-, calculated 561.01 (M = C<sub>23</sub>H<sub>23</sub>N<sub>5</sub>O<sub>8</sub>S<sub>2</sub>).

5  
6 **Co-factor determination and peptide mass verification.** Absorption spectra of purified  
7 enzyme were recorded on a HP 8435 diode array UV-VIS spectrophotometer in Tris-Cl pH 7.9,  
8 100 mM NaCl.

9 Anion exchange high pressure liquid chromatography (AX-HPLC) in 38 mM Tris-Cl pH  
10 8.0 with a NaBr gradient (progressive 0-300 mM over 8 min then linear up to 1 M at 10 min)  
11 provided clearer separation between native BTI azoreductase and candidate flavins; riboflavin,  
12 FMN and FAD than achieved by an earlier method (3).

13 Liquid chromatography electrospray ionization mass spectrometry (LC-ESI-MS) was  
14 carried out on a Micromass LCT (Manchester, UK) using a Z-spray mk2 source, interfaced with  
15 a Waters Acquity ultra high pressure LC (UPLC) (Milford, MA).

16 BTI10 and flavin reference samples were examined similarly to a published protocol (1).  
17 Samples were separated by UPLC on a BEH300 C18 column (Waters, Milford, MA) in a linear  
18 gradient of denaturing 100% 50 mM ammonium formate, pH 5.9 to 100% acetonitrile over 6 min  
19 at a flow rate of 400 µl / min. For ES ionization, positive ions were generated at 2.8 kV at the  
20 capillary, at 40 V at the cone, and at 4 V at the extraction cone, with a desolvation gas flow rate  
21 of 750 L/hr, a cone gas flow rate of 50 L/hr, a capillary temperature of 350 °C, and a source  
22 temperature of 120 °C. Masses were acquired in TOF full scan mode (m/z: 200:40000) at two  
23 scans per second. Horse heart myoglobin (16,951.49 Da) was used as an internal standard for

1 the determination of the full mass of the BTI azoreductase peptide. Multicharged proteins were  
2 deconvoluted by the MaxEnt-1 program, as part of the MassLynx 4.1 software (Waters, Milford,  
3 MA).

4 **Enzymatic reduction of azo dyes at different pH.** Ammonia-MES, -MOPS, -HEPES,  
5 and -CHES buffers that also promote  $\beta$ -NADPH stability (15, 17, 23) were used at 20 mM final  
6 concentrations.

## 9 SUPPLEMENTAL RESULTS

10 **The BTI azoreductase.** The BTI1 (Biosearch Technologies, Inc. azoreductase #1)  
11 azoreductase gene isolated by PCR amplification of DNA from a locally obtained soil sample  
12 encodes a protein of 178 amino acids (Figs. S1 and S2) that is only 96 % identical to the OY1-2  
13 azoreductase on which the primers were based, but identical in sequence to a putative FMN  
14 reductase from *B. cereus* Rock 4-18. An alignment of *Bacillaceae* protein sequences (Fig. S2)  
15 including two structure-determined group II azobenzene reductases (PDB ID: 1nni and 2gsw;  
16 unpublished), as well as the *Saccharomyces cerevisiae* oxidoreductase Lot6p (Ylr011wp) (PDB  
17 ID: 1t0i) (13), reveal certain variable residues; a surface exposed patch within the last alpha  
18 helix, one residue within the enzyme hydrophobic core (Cys 70), and one at the edge of the  
19 active site (Leu 13). Strong conservation between BTI1 and YhdA of residues of the FMN  
20 harboring active site (27/28 identical or conserved residues) enabled 3D Modeling of BTI1 based  
21 on the three structures 1nni, 2gsw, and 1t0i (not shown). The model confirmed a flavodoxin core  
22 with conserved flavin binding sites at the dimer subunit interface and accessible N- and C-  
23 termini (**cf. Fig. S3**).

1 A functionalized form of BTI1, BTI10, with C-terminal His<sub>6</sub> and Myc peptides for ease  
2 of purification and identification by western analysis, as well as the non-conserved Cys 70  
3 mutated to Val to enable site-directed insertion of single cysteine residues was constructed and  
4 expressed in *E. coli* (see supplementary methods for details). Neither the added peptides, nor the  
5 Cys70Val mutation affected enzymatic activity (not shown), similarly to related enzymes (22).  
6 Large quantities (>10 mg / 100 ml culture) of concentrated (> 4 mg / ml) enzyme that remained  
7 soluble and active over several months at + 4 °C were easily obtained.

8 **Verification of expressed protein.** Purified BTI10 migrated as a ~27 kDa single band in  
9 SDS-PAGE (Fig. S4, left panel), slightly slower than predicted. The identity of BTI10 was  
10 verified by liquid chromatography electrospray ionization mass spectrometry (LC-ESI-MS). The  
11 observed mass of 22,210.8 Da for the free polypeptide (Tab. SI, right panel) agreed well with the  
12 calculated mass of the polypeptide having undergone post-translational removal of the N-  
13 terminal fMet residue (22,209.5 Da).

14 The oligomeric state of the BTI azoreductase as assessed by native PAGE revealed that  
15 purified BTI10 migrated as a single band with a Mr of  $90 \pm 10$  kDa (Fig. S4, right panel),  
16 consistent with a homo-tetrameric configuration (Mcalc: 90.7 kDa). Two further variants of  
17 BTI1(C70V) in which the C-terminal tag was either left attached, or removed by proteases, also  
18 migrated as homo-tetramers. Oligomerization of the C-terminally trimmed proteins only  
19 occurred at concentrations over  $10 \text{ mg} \cdot \text{ml}^{-1}$  (not shown).

20 **The BTI1 co-factor is FMN.** The yellow color of the BTI azoreductase and its  
21 relatedness to known FMN-dependent azoreductases suggested a firmly bound flavin co-factor.  
22 The type of flavin bound to an enzyme is known to influence its reductive potential (4, 8, 18) and  
23 this prompted us to characterize the BTI10-associated flavin(s). The flavin absorption signature



1 revealed by UV-vis spectroscopy was slightly blue-shifted in the native enzyme as compared to  
2 the denatured enzyme and free flavins (not shown). The absorption spectrum of BTI10 (with  
3 maxima at 275, 374, and *ca.* 450 nm) changed upon reduction with NADPH into one  
4 predominant peak at 275 nm consistent with flavin reduction.

5 Additional anion exchange HPLC (AX-HPLC) provided clear separation between the  
6 candidate flavins and native BTI10 protein. Reference samples of pure RF, FMN and FAD  
7 eluted at 1.0, 3.2, and at 4.2 min, respectively (Tab. SI, left panel). Native protein retained the  
8 flavin as evidenced by significantly delayed elution (8.6 min) of a peak with a flavin absorption  
9 signature. The absolute majority of the flavin released by denaturation in 2 % SDS eluted at 3.2  
10 min and only a trace amount at 4.2 min. Results from co-injection of denatured BTI10 and each  
11 flavin, or with a mixture of the three, clearly confirmed co-elution of the BTI10-bound flavin  
12 with FMN. Thermal denaturation of BTI10 also released the bound flavin, but it eluted as several  
13 peaks correlating with FMN and riboflavin suggesting partial heat-induced de-phosphorylation  
14 of FMN. These data are consistent with FMN as a non-covalently bound cofactor, and  
15 association of trace amounts of FAD.

16 The co-factor identity was verified when purified BTI10 was subjected to LC-ESI-MS;  
17 the LC time of migration and the absorption spectrum of the flavin released from the  
18 azoreductase were consistent with that of FMN and more importantly, the observed molecular  
19 mass of the released flavin (457.10 Da) also was consistent with that of free FMN (457.06 Da)  
20 (Tab. SI, right panel). Close scrutiny of the MS data in the mass range of FAD revealed a mass  
21 of 786.1, barely above background, again consistent with trace amounts of non-covalently bound  
22 FAD. It was concluded that the BTI azoreductase cofactor is non-covalently bound FMN.

23

1           **Cation sensitivity.** Reduction of MeO was assessed in MES pH 6.0 at 0-500 mM KCl  
2 and NaCl and at 0-50 MgCl<sub>2</sub>. The decolorization rate of MeO was moderately enhanced by Mg<sup>2+</sup>  
3 up to 10 mM, possibly due to increased NADPH availability (24). KCl and NaCl 80 mM and  
4 above slightly decreased the reduction rate. Subsequently, ammonia was used to adjust the pH of  
5 all buffers (See supplemental methods).

6  
7           **Substrate solubility and NADPH sensitivity.** The disappearance of absorbance at the  
8 dyes'  $\lambda_{\text{max}}$  was monitored at pH 5.5-8.3 over time in buffer alone, or in buffer with NADPH.  
9 Alizarin Yellow and *p*-Methyl Red (*p*-MeR) could not be assessed for enzymatic reduction due  
10 to insufficient solubility. Both Nitronaphthyl-DMA and Orange II were unaffected by NADPH,  
11 but their absorbance spectra changed within 30 min of dilution into aqueous buffers indicating  
12 aggregation, also noted by others (2). BTI10 did not reduce Nitronaphthyl-DMA, and Orange II  
13 only slowly, possibly due to such aggregation. Basic Blue 41 and Orange I remained soluble, but  
14 were unstable to NADPH; absorption at their maxima faded within 30 minutes.

15

## 1 SUPPLEMENTAL REFERENCES

2

- 3 1. **Adams, M. A., and Z. Jia.** 2006. Modulator of drug activity B from *Escherichia coli*:  
4 crystal structure of a prokaryotic homologue of DT-diaphorase. *J Mol Biol* **359**:455-65.
- 5 2. **Ball, P., and C. H. Nicholls.** 1982. Azo-hydrazone tautomerism of hydroxyazo  
6 compounds—a review. *Dyes Pigments* **3**:5-26.
- 7 3. **Batey, D. W., and C. D. Eckhert.** 1990. Identification of FAD, FMN, and riboflavin in  
8 the retina by microextraction and high-performance liquid chromatography. *Anal*  
9 *Biochem* **188**:164-7.
- 10 4. **Casaus, J. L., J. A. Navarro, M. Hervas, A. Lostao, M. A. De la Rosa, C. Gomez-**  
11 **Moreno, J. Sancho, and M. Medina.** 2002. *Anabaena* sp. PCC 7119 flavodoxin as  
12 electron carrier from photosystem I to ferredoxin-NADP<sup>+</sup> reductase. Role of Trp(57) and  
13 Tyr(94). *J Biol Chem* **277**:22338-44.
- 14 5. **Chen, H., S. L. Hopper, and C. E. Cerniglia.** 2005. Biochemical and molecular  
15 characterization of an azoreductase from *Staphylococcus aureus*, a tetrameric NADPH-  
16 dependent flavoprotein. *Microbiology* **151**:1433-41.
- 17 6. **Clement, P. M., C. A. Henderson, Z. A. Jenkins, Z. Smit-McBride, E. C. Wolff, J.**  
18 **W. Hershey, M. H. Park, and H. E. Johansson.** 2003. Identification and  
19 characterization of eukaryotic initiation factor 5A-2. *Eur J Biochem* **270**:4254-63.
- 20 7. **Cook, R. M., M. H. Lyttle, and D. Dick.** Mar 28 2006. Dark quenchers for donor-  
21 acceptor energy transfer. USA patent US 7019129.
- 22 8. **Fraaije, M. W., and A. Mattevi.** 2000. Flavoenzymes: diverse catalysts with recurrent  
23 features. *Trends Biochem Sci* **25**:126-32.
- 24 9. **Hoffmaster, A. R., J. Ravel, D. A. Rasko, G. D. Chapman, M. D. Chute, C. K.**  
25 **Marston, B. K. De, C. T. Sacchi, C. Fitzgerald, L. W. Mayer, M. C. Maiden, F. G.**  
26 **Priest, M. Barker, L. Jiang, R. Z. Cer, J. Rilstone, S. N. Peterson, R. S. Weyant, D.**  
27 **R. Galloway, T. D. Read, T. Popovic, and C. M. Fraser.** 2004. Identification of  
28 anthrax toxin genes in a *Bacillus cereus* associated with an illness resembling inhalation  
29 anthrax. *Proc Natl Acad Sci USA* **101**:8449-54.
- 30 10. **Ivanova, N., A. Sorokin, I. Anderson, N. Galleron, B. Candelon, V. Kapatral, A.**  
31 **Bhattacharyya, G. Reznik, N. Mikhailova, A. Lapidus, L. Chu, M. Mazur, E.**  
32 **Goltsman, N. Larsen, M. D'Souza, T. Walunas, Y. Grechkin, G. Pusch, R.**  
33 **Haselkorn, M. Fonstein, S. D. Ehrlich, R. Overbeek, and N. Kyrpides.** 2003. Genome  
34 sequence of *Bacillus cereus* and comparative analysis with *Bacillus anthracis*. *Nature*  
35 **423**:87-91.
- 36 11. **Kodumal, S. J., K. G. Patel, R. Reid, H. G. Menzella, M. Welch, and D. V. Santi.**  
37 2004. Total synthesis of long DNA sequences: synthesis of a contiguous 32-kb  
38 polyketide synthase gene cluster. *Proc Natl Acad Sci USA* **101**:15573-8.
- 39 12. **Larkin, M. A., G. Blackshields, N. P. Brown, R. Chenna, P. A. McGettigan, H.**  
40 **McWilliam, F. Valentin, I. M. Wallace, A. Wilm, R. Lopez, J. D. Thompson, T. J.**  
41 **Gibson, and D. G. Higgins.** 2007. Clustal W and Clustal X version 2.0. *Bioinformatics*  
42 **23**:2947-8.
- 43 13. **Liger, D., M. Graille, C. Z. Zhou, N. Leulliot, S. Quevillon-Cheruel, K. Blondeau, J.**  
44 **Janin, and H. van Tilbeurgh.** 2004. Crystal structure and functional characterization of

- 1 yeast YLR011wp, an enzyme with NAD(P)H-FMN and ferric iron reductase activities. J  
2 Biol Chem **279**:34890-7.
- 3 14. **Marchler-Bauer, A., J. B. Anderson, M. K. Derbyshire, C. DeWeese-Scott, N. R.**  
4 **Gonzales, M. Gwadz, L. Hao, S. He, D. I. Hurwitz, J. D. Jackson, Z. Ke, D. Krylov,**  
5 **C. J. Lanczycki, C. A. Liebert, C. Liu, F. Lu, S. Lu, G. H. Marchler, M.**  
6 **Mullochandov, J. S. Song, N. Thanki, R. A. Yamashita, J. J. Yin, D. Zhang, and S. H.**  
7 **Bryant.** 2007. CDD: a conserved domain database for interactive domain family  
8 analysis. Nucleic Acids Res **35**:D237-40.
- 9 15. **Markham, K. A., R. S. Sikorski, and A. Kohen.** 2003. Purification, analysis, and  
10 preservation of reduced nicotinamide adenine dinucleotide 2'-phosphate. Anal Biochem  
11 **322**:26-32.
- 12 16. **Rasko, D. A., M. R. Altherr, C. S. Han, and J. Ravel.** 2005. Genomics of the *Bacillus*  
13 *cereus* group of organisms. FEMS Microbiol Rev **29**:303-29.
- 14 17. **Rover, J., L., J. C. Fernandes, G. de Oliveira Neto, L. T. Kubota, E. Katekawa, and**  
15 **S. H. Serrano.** 1998. Study of NADH stability using ultraviolet-visible  
16 spectrophotometric analysis and factorial design. Anal Biochem **260**:50-5.
- 17 18. **Simonsen, R. P., and G. Tollin.** 1980. Structure-function relations in flavodoxins. Mol  
18 Cell Biochem **33**:13-24.
- 19 19. **Studier, F. W., A. H. Rosenberg, J. J. Dunn, and J. W. Dubendorff.** 1990. Use of T7  
20 RNA polymerase to direct expression of cloned genes. Methods Enzymol **185**:60-89.
- 21 20. **Sugiura, W., T. Yoda, T. Matsuba, Y. Tanaka, and Y. Suzuki.** 2006. Expression and  
22 characterization of the genes encoding azoreductases from *Bacillus subtilis* and  
23 *Geobacillus stearothermophilus*. Biosci Biotechnol Biochem **70**:1655-65.
- 24 21. **Suzuki, Y., T. Yoda, A. Ruhul, and W. Sugiura.** 2001. Molecular cloning and  
25 characterization of the gene coding for azoreductase from *Bacillus* sp. OY1-2 isolated  
26 from soil. J Biol Chem **276**:9059-65.
- 27 22. **Wang, C. J., C. Hagemeyer, N. Rahman, E. Lowe, M. Noble, M. Coughtrie, E. Sim,**  
28 **and I. Westwood.** 2007. Molecular cloning, characterisation and ligand-bound structure  
29 of an azoreductase from *Pseudomonas aeruginosa*. J Mol Biol **373**:1213-28.
- 30 23. **Wu, J. T., L. H. Wu, and J. A. Knight.** 1986. Stability of NADPH: effect of various  
31 factors on the kinetics of degradation. Clin Chem **32**:314-9.
- 32 24. **Yan, B., J. Zhou, J. Wang, C. Du, H. Hou, Z. Song, and Y. Bao.** 2004. Expression and  
33 characteristics of the gene encoding azoreductase from *Rhodobacter sphaeroides*  
34 AS1.1737. FEMS Microbiol Lett **236**:129-36.
- 35  
36
